# Supplementary material
Source: PubMed Central journal article supplement (PMC4078406)
Supplement: NIHMS592023-supplement-1.pdf [file NIHMS592023-supplement-1.pdf]

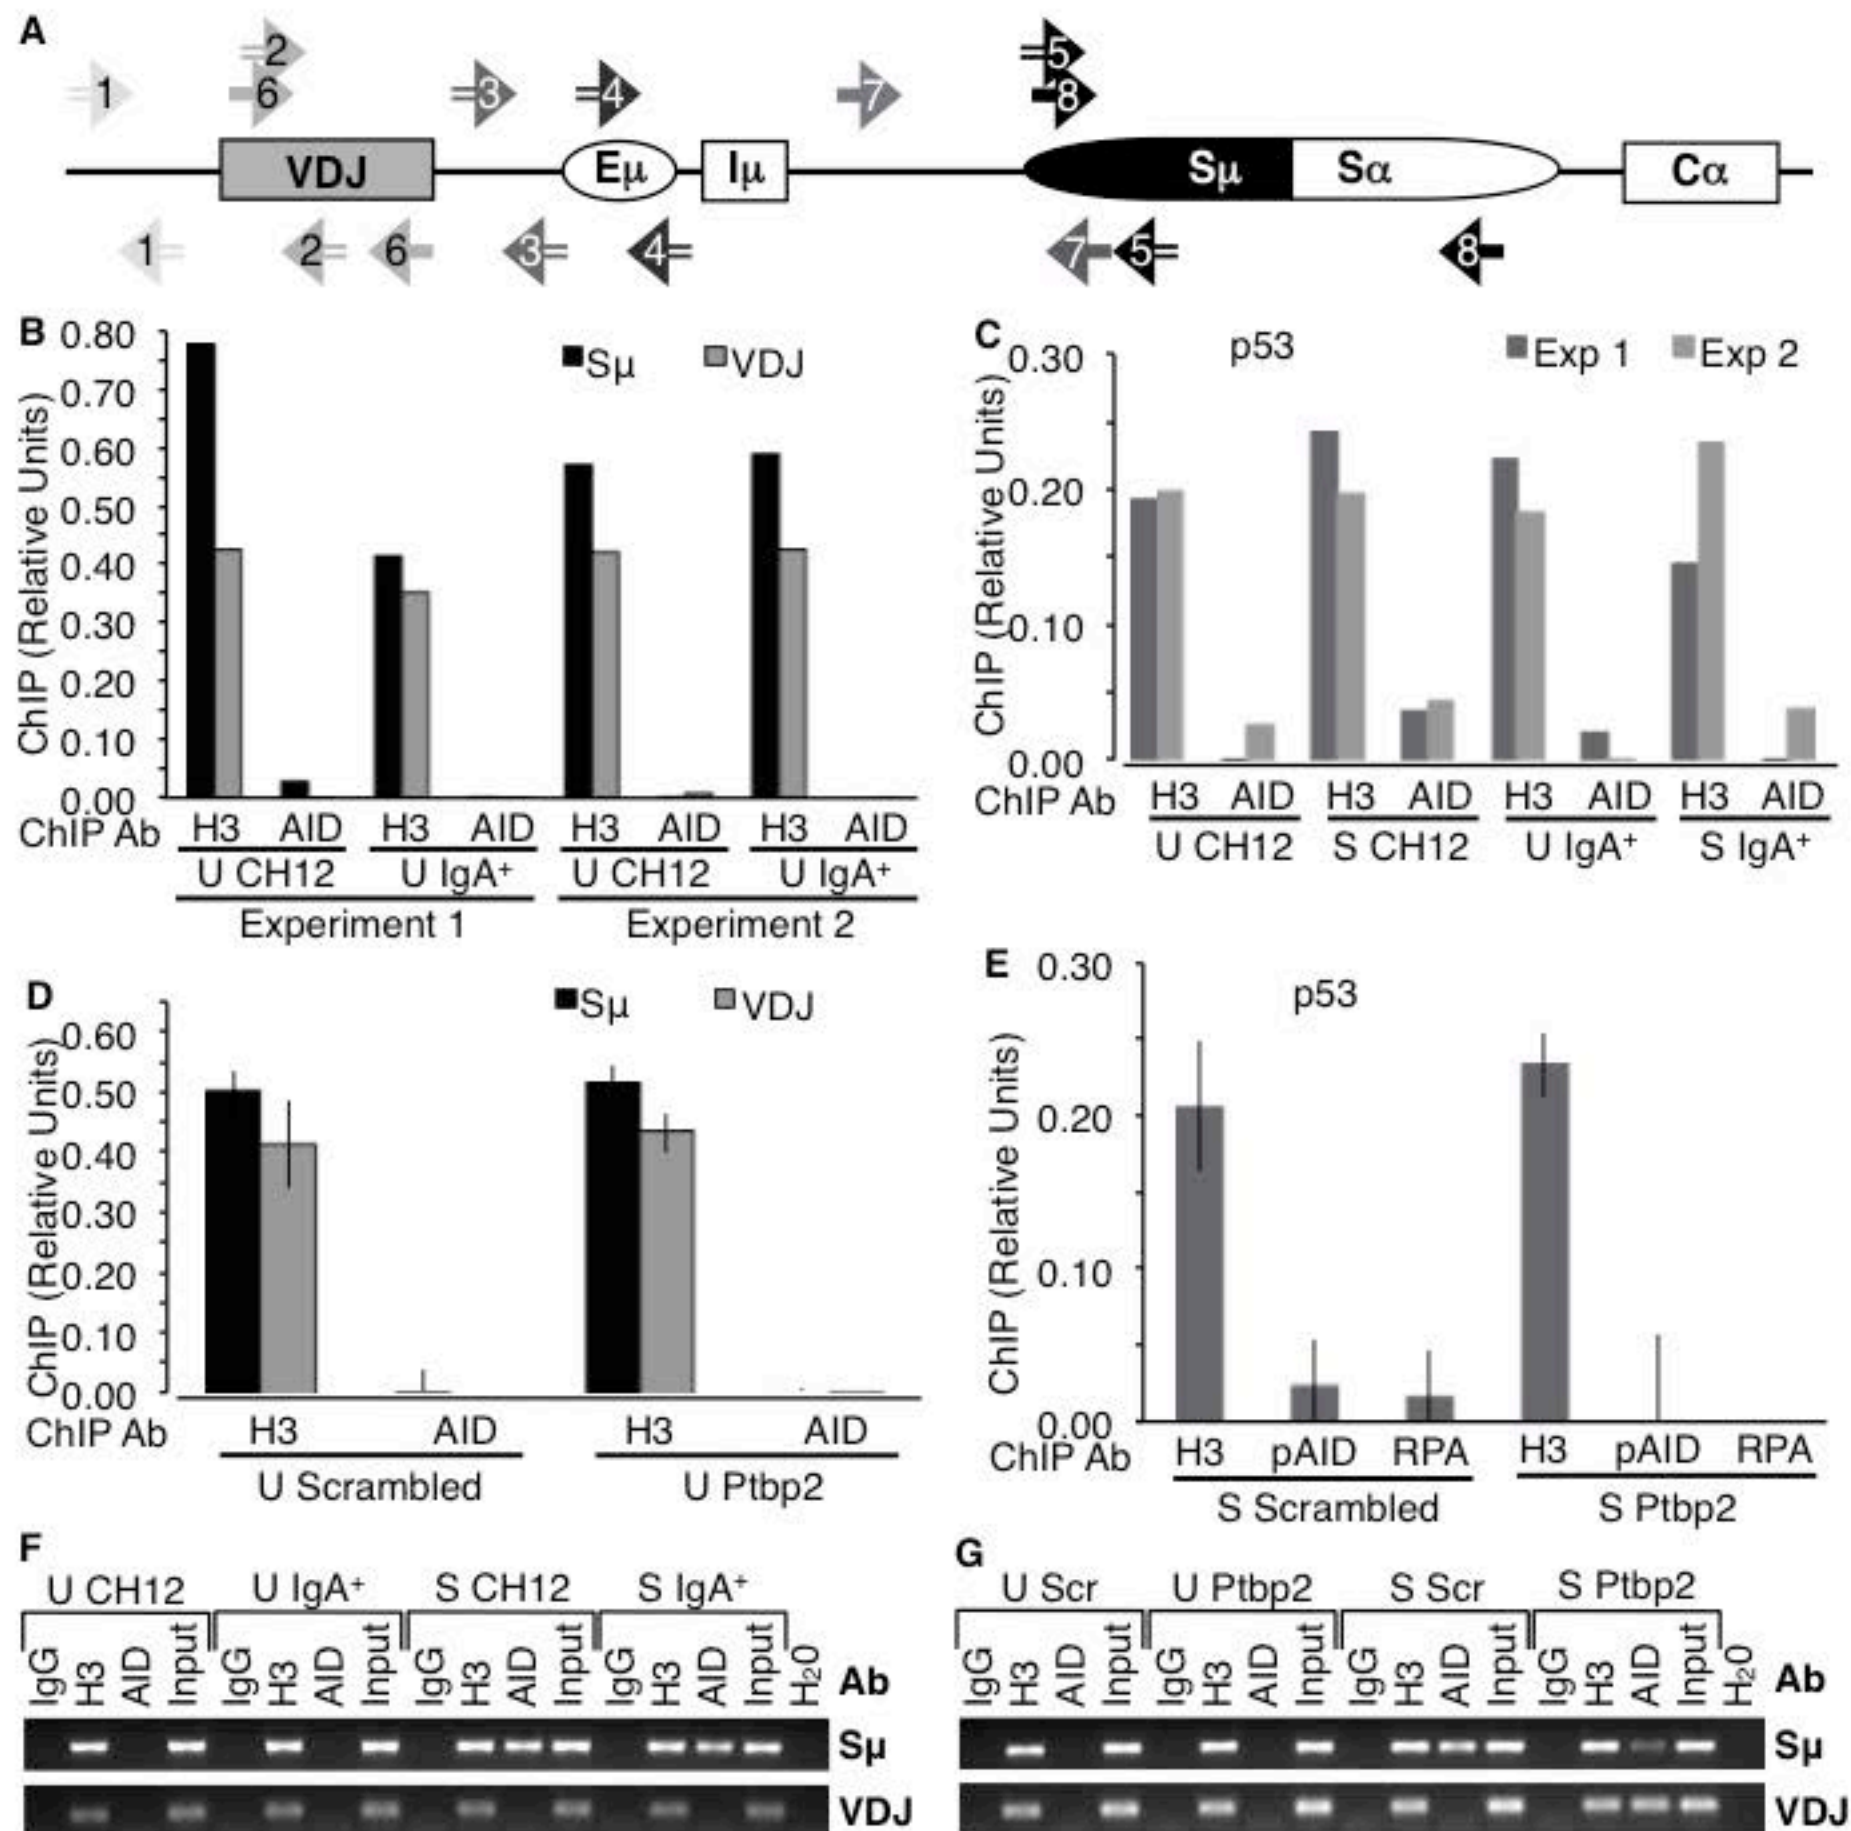

**SUPPLEMENTARY FIGURE 1.** Control samples/regions for ChIP analysis and representative gels. (A) Location of ChIP and sequencing primers within the *Igh* locus of an IgA<sup>+</sup> CH12 cell. Positions of primers used for ChIP (designated by arrows with double lines) and sequencing (designated by arrows with solid lines) analyses are shown. Numbers within arrows correspond to primer sequence listed in Supplementary Table 2. All distances approximate. Presence of specified DNA region was quantitated by qPCR using sequence-specific primers. For  $n > 2$ , mean and standard deviation shown. (B) AID or H3 binding to S $\mu$  or VDJ in unstimulated (U) CH12 or IgA<sup>+</sup> cells. Two independent experiments shown. (C) AID or H3 binding to p53 sequence (negative control) in unstimulated (U)- and CIT-stimulated (S) CH12 and IgA<sup>+</sup> cells. Two independent experiments shown. (D) AID or H3 binding to S $\mu$  or VDJ in unstimulated (U) CH12 cells expressing either scrambled or Ptpb2 shRNA constructs;  $n = 4$ . (E) Binding of pS38-AID (pAID), RPA or H3 to p53 sequence (negative control) in CIT-stimulated (S) scrambled and Ptpb2-depleted (Ptpb2) CH12 cells;  $n = 3$ . (F-G) Representative gels of ChIP S $\mu$  and VDJ qPCR reactions from unstimulated (U) and stimulated (S) (F) CH12 or IgA<sup>+</sup> cells and (G) CH12 cells expressing either scrambled (Scr) or Ptpb2 shRNA constructs.

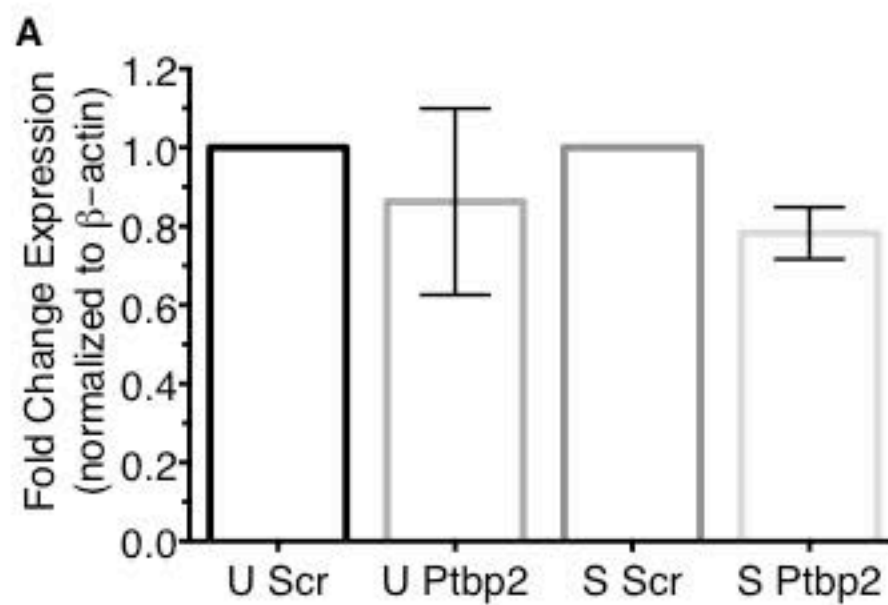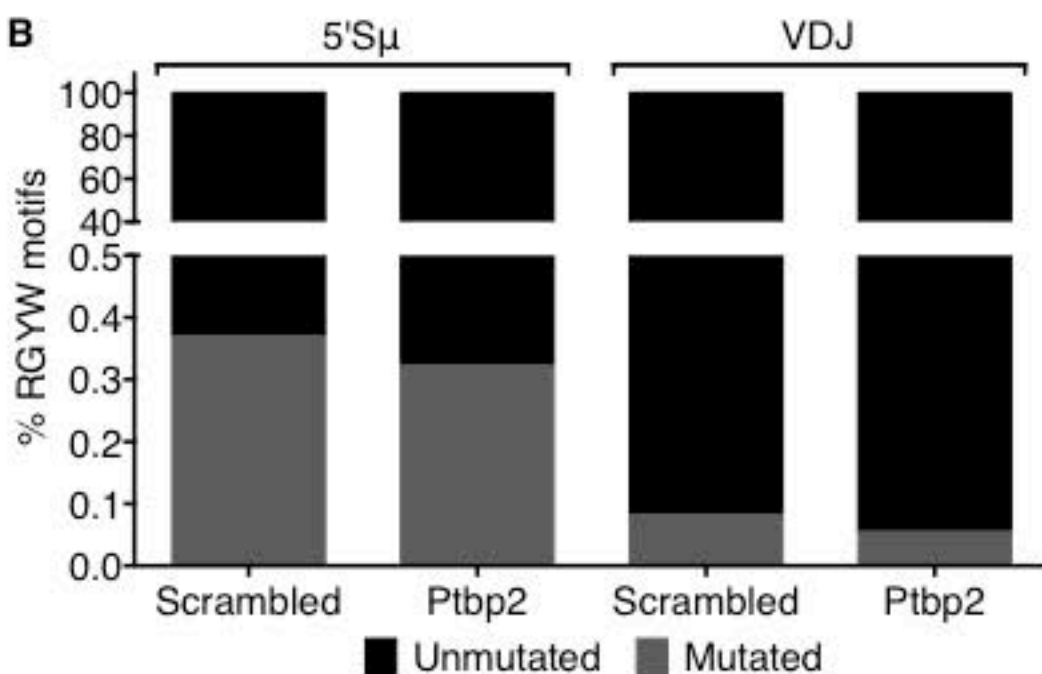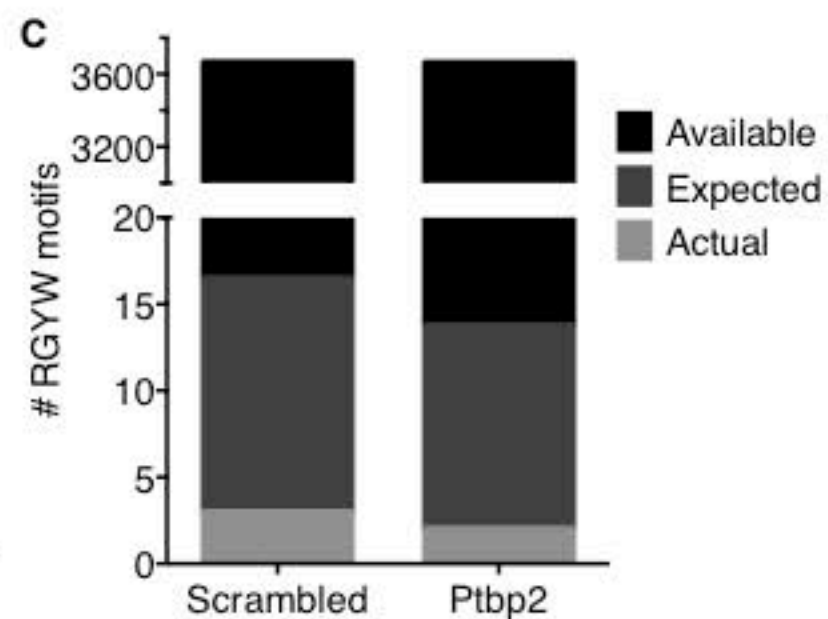

**SUPPLEMENTARY FIGURE 2.** *Igh V* gene (VDJ) transcript levels and RGYW mutation spectra in shRNA-transduced CH12 cells. **(A)** Normalized fold change expression of VDJ transcripts quantitated by one-step qRT-PCR with SYBR Green in RNA harvested from unstimulated (U) or CIT-stimulated (S) CH12 cells expressing scrambled (Scr) or Ptpb2 shRNA constructs;  $n = 4$ . 'Fold Change Expression' was calculated using crossing threshold (Ct) values and the Pfaffl method for analyzing real-time data assuming 100% efficiency, which sets fold change expression equal to the ratio of [2 to the power of  $\Delta C_t$  target (control – treated)] over [2 to the power of  $\Delta C_t$  reference (control – treated)]; where target is VDJ, reference is  $\beta$ -actin, control is scrambled and treated is Ptpb2. For unstimulated samples U Scr was used as the control, while for stimulated samples S Scr was used as the control. Data represent the mean and error bars show standard deviation from the mean. RNA was isolated from  $3 \times 10^6$  CH12 cells cultured with or without CIT for 96 hours. VDJ primers used for ChIP analysis were used for qRT-PCR analysis. **(B)** Percentage unmutated (black) and mutated (gray) RGYW motifs found in total bases sequenced from the 5' S $\mu$  region or *Igh V* gene (VDJ) of CIT-stimulated scrambled or Ptpb2-depleted (Ptpb2) CH12 cells. **(C)** Total number of RGYW motifs: available for mutation (black), actually mutated (light gray), or expected to be mutated if mutation frequency was equivalent to that found in 5' S $\mu$  region (medium gray), of total *Igh V* gene (VDJ) bases sequenced from CIT-stimulated scrambled or Ptpb2-depleted (Ptpb2) CH12 cells. Data represent four independent samples.

|                    | # sequences | # of sequences with n mutations |   | bases sequenced | total mutations | mutation frequency |
|--------------------|-------------|---------------------------------|---|-----------------|-----------------|--------------------|
|                    |             | 0                               | 1 |                 |                 |                    |
| U IgA <sup>+</sup> | 231         | 230                             | 1 | 66,297          | 1               | 1.51E-05           |
| S IgA <sup>+</sup> | 239         | 238                             | 1 | 68,593          | 1               | 1.46E-05           |

#### B. S $\mu$ -Sa

|                    | # sequences A | # sequences B | total # sequences | # sequences with deletion | # of sequences with n mutations |     |     |     |
|--------------------|---------------|---------------|-------------------|---------------------------|---------------------------------|-----|-----|-----|
|                    |               |               |                   |                           | A 1                             | A 2 | B 1 | B 2 |
| U IgA <sup>+</sup> | 43            | 138           | 182               | 1                         | 1                               | 0   | 1   | 0   |
| S IgA <sup>+</sup> | 36            | 132           | 185               | 17                        | 13                              | 1   | 7   | 0   |

|                    | total mutations |    |   | bases sequenced | total mutations | mutation frequency |
|--------------------|-----------------|----|---|-----------------|-----------------|--------------------|
|                    | 0               | 1  | 2 |                 |                 |                    |
| U IgA <sup>+</sup> | 180             | 2  | 0 | 65,515          | 2               | 3.05E-05           |
| S IgA <sup>+</sup> | 164             | 20 | 1 | 64,568          | 20              | 3.10E-04           |

#### C. VDJ

|               | # sequences | # of sequences with n mutations |   |   | bases sequenced | total mutations | mutation frequency |
|---------------|-------------|---------------------------------|---|---|-----------------|-----------------|--------------------|
|               |             | 0                               | 1 | 2 |                 |                 |                    |
| U Scrambled   | 232         | 232                             | 0 | 0 | 66,584          | 0               | 0.00E+00           |
| S Scrambled   | 228         | 225                             | 3 | 0 | 65,436          | 3               | 4.85E-05           |
| U Ptpb2       | 229         | 229                             | 0 | 0 | 65,723          | 0               | 0.00E+00           |
| S Ptpb2       | 228         | 226                             | 2 | 0 | 65,436          | 2               | 3.06E-05           |
| 3 wks S Ptpb2 | 191         | 190                             | 1 | 0 | 54,817          | 1               | 1.82E-05           |

#### D. 5' S $\mu$

|             | # sequences | # of sequences with n mutations |    |   | bases sequenced | total mutations | mutation frequency |
|-------------|-------------|---------------------------------|----|---|-----------------|-----------------|--------------------|
|             |             | 0                               | 1  | 2 |                 |                 |                    |
| S Scrambled | 111         | 98                              | 12 | 1 | 62,160          | 14              | 2.25E-04           |
| S Ptpb2     | 112         | 104                             | 7  | 1 | 62,720          | 9               | 1.43E-04           |

#### E. RGYW

|           | 5' S $\mu$ |               |             |             | VDJ    |               |             |             |                                   |
|-----------|------------|---------------|-------------|-------------|--------|---------------|-------------|-------------|-----------------------------------|
|           | # seqs     | # RGYW motifs | # RGYW muts | % RGYW muts | # seqs | # RGYW motifs | # RGYW muts | % RGYW muts | # Expected if equal to 5' S $\mu$ |
| Scrambled | 111        | 2163          | 8           | 0.37        | 228    | 3648          | 3           | 0.08        | 13.49                             |
| Ptpb2     | 112        | 2173          | 7           | 0.32        | 228    | 3648          | 2           | 0.05        | 11.75                             |

**SUPPLEMENTARY TABLE 1.** Absolute number of mutations in the *Igh* V gene and S regions of IgA<sup>+</sup> or CH12 cells. Mutation frequency expressed as number of unique mutations per total bases sequenced. Mutations present in the (A) *Igh* V gene (VDJ) and (B) S $\mu$  – Sa junction of unstimulated (U) or CIT-stimulated (S) IgA<sup>+</sup> cells. The IgA<sup>+</sup> cell line used for mutation analysis consisted of two clonal populations; both with the same *Igh* V gene, but with a different S $\mu$  – Sa junction (indicated as either A or B sequences and mutations). Both A and B populations contained sequences with deletions and mutations (data not shown), indicating that AID was reactivated regardless of the S $\mu$  – Sa junction expressed by the cell. One S $\mu$  – Sa junction sequence contained 2 mutations, but was not included in the mutation frequency calculation since each mutation was also found in 2 separate sequences, and thus were not unique. Mutations present in the (C) *Igh* V gene (VDJ) and (D) 5' S $\mu$  region of unstimulated (U) or CIT-stimulated (S) CH12 cells expressing either scrambled or Ptpb2 shRNA constructs. Mutations in VDJ of Ptpb2-depleted CH12 cells continuously CIT-stimulated for 3 weeks (3 wks S Ptpb2) are also listed in (C). (E) Mutations (muts) at RGYW motifs in total bases sequenced from the 5' S $\mu$  region or *Igh* V gene (VDJ) of CIT-stimulated scrambled or Ptpb2-depleted (Ptpb2) CH12 cells. Percent RGYW mutations (% RGYW muts) expressed as number of RGYW motifs mutated (# RGYW muts) per total number of RGYW motifs sequenced (# RGYW motifs = number of sequences multiplied by number of RGYW motifs in sequenced region) multiplied by 100. Number expected if equal to 5' S $\mu$  region = 5' S $\mu$  % RGYW mutations multiplied by VDJ number RGYW motifs divided by 100.

| # | Name                            | Forward                       | Reverse                             |
|---|---------------------------------|-------------------------------|-------------------------------------|
| 1 | 5'Vh1-53                        | CTAATGGGCAGAGAATGTCTGTACT     | CCTCCATTCATGATACATCAACTTA           |
| 2 | VDJ (ChIP)                      | AGCCTGGGACTGAACTGGT           | AGGTGTAGCCAGAAGCCTTG                |
| 3 | 3'Jh2                           | TCGGATACTGTATAAATGCTGTAC      | AGGACAGATTATCTCCACATCTTTG           |
| 4 | I <sub>H</sub> promoter         | GCTCAGCCTGGACTTTCGGTTTGGT     | GGAGTCAAGATGGCCGATCAGAACC           |
| 5 | S <sub>H</sub>                  | TAGTAAGCGAGGCTCTAAAAGCAT      | AGAACAGTCCAGTGTAGGCAGTAGA           |
| 6 | VDJ                             | AACTGCAGCAGCCTGGGACTGAACTG    | GGTGCCTTGGCCCCAGTAGTCAAAGTAGT       |
| 7 | 5'S <sub>H</sub>                | GCGGCCCGGCTCATTCCAGTTCATTACAG | AATGGATACCTCAGTGGTTTTTAATGGTGGGTTTA |
| 8 | S <sub>H</sub> – S <sub>α</sub> | TTGAGAGCCCTAGTAAGCGAGGCTCTA   | GAAGTGTGAATAAGTCCAGTCATGCTAAT       |
|   | p53                             | CCCAGAGACTGCTGTAAAGTAGAACC    | CGCCACAGCGTGGTGGTACC                |
|   | C <sub>H</sub>                  | AGCACCATTTCTTCCACCTGGA        | TGTCCTCAGTGTTGGGAAGGTT              |
|   | VJk                             | GTCCTTTCTTTTCTGCTTAACTCT      | GTTAACAGTTCATCTGGTTTCTG             |
|   | Cdc45l                          | TGGTCTAGAGCTCGCCAAGAAGC       | CCTCCATGAGTGAGCAGTAGAGAAAAG         |
|   | Dusp1                           | CTGAGTTCCACTGAGTTCCTAAGCAG    | CAGGCAAGCGAAGAACTGCCTC              |
|   | Fabp5                           | AGGAGTAGGACTGGCTCTTAGGAAG     | GTCGTCTTCACTGTGCTCTCGG              |
|   | Melk                            | GGCAAAGTGACAATGCAGTTTGAAGTGG  | GGTCACATCTTGCAGCCAGACAAG            |

**SUPPLEMENTARY TABLE 2.** Primer sequences. Name and nucleotide sequence of primers used in ChIP and mutational analyses are listed. Number corresponds to numbering depicted in Supplementary Figure 1A.
